# Supplementary material for: The Somatic Mutation Paradigm in Congenital Malformations: Hirschsprung Disease as a Model
Source: MDPI journal article supplement (doi:10.3390/ijms222212354), 2021-11-16
Supplement: s1 [file s1]

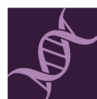

## Supplementary Tables

Supplementary Table S1. Exome sequencing quality information.

| Patient | Cell type   | reads    | Mapped reads | Mapped reads (%) | Mean coverage | 20X coverage (n bases) | Overlapping 20X coverage | Variants (n) <sup>#</sup> | Overlapping variants (n) <sup>#</sup> | Concordance rate 20 X (%) |
|---------|-------------|----------|--------------|------------------|---------------|------------------------|--------------------------|---------------------------|---------------------------------------|---------------------------|
| 1       | blood       | 43692456 | 42653058     | 97.6             | -             | 1009526                | 891280                   | 77521                     | 65576                                 | 98.4                      |
| 1       | ENCC        | 45158829 | 44428963     | 98.4             | -             | 936993                 |                          | 87810                     |                                       | -                         |
| 2       | blood       | 46663496 | 45464802     | 97.4             | -             | 1052613                | 1005681                  | 82750                     | 73769                                 | 99.0                      |
| 2       | ENCC        | 51612528 | 50248904     | 97.4             | -             | 1056654                |                          | 85342                     |                                       | -                         |
| 3       | blood       | 73084700 | 72360584     | 99.0             | -             | 2951928                | 2765133                  | 92565                     | 64458                                 | 98.8                      |
| 3       | ENCC        | 71473344 | 70723194     | 99.0             | -             | 2887416                |                          | 95400                     |                                       | -                         |
| 4       | fibroblasts | 71515650 | 70770498     | 99.0             | -             | 2896756                | 1988647                  | 95491                     | 65780                                 | 98.6                      |
| 4       | ENCC        | 68160814 | 58726936     | 86.2             | -             | 2068315                |                          | 109987                    |                                       | -                         |
| 5       | blood       | 72927952 | 72048920     | 98.8             | -             | 2917188                | 2661452                  | 96952                     | 84900                                 | 99.6                      |
| 5       | ENCC        | 69489918 | 68471026     | 98.5             | -             | 2768779                |                          | 97171                     |                                       | -                         |

Depicted are the number of reads sequenced and mapped to the hg19 reference genome. Coverage statistics and ENCC-germline concordance rate at 20X coverage represent the starting amount of bases at which somatic mosaicism was evaluated. <sup>#</sup>variants counted with a read depth of five or higher at 20X coverage.

**Supplementary Table S3. Germline variants in HSCR disease genes.**

| Patient | Gene   | cDNA     | Type            | dbSNP      | gnomAD<br>exome | gnomAD<br>Genome | CADD | Class |
|---------|--------|----------|-----------------|------------|-----------------|------------------|------|-------|
| 1       | TBATA  | c.T666C  | Synonymous      | rs2254433  | 0.26            | 0.30             | -    | LB    |
| 1       | VCL    | c.G2388A | Synonymous      | rs767809   | 0.48            | 0.43             | -    | LB    |
| 1       | ZEB2   | c.G3480A | Synonymous      | -          | .               | .                |      | LB    |
| 2       | GFRA1* | c.A1T    | Start site loss | -          | .               | .                | 23   | VUS   |
| 2       | ZEB2   | c.G3480A | Synonymous      | -          | .               | .                | -    | LB    |
| 2       | DENND3 | c.C1110T | Synonymous      | rs2289001  | 0.34            | 0.27             | -    | LB    |
| 4       | NRG3*  | c.C59G   | Missense        | rs1884282  | 0.12            | 0.13             | 3.3  | LB    |
| 4       | NRG3   | c.A1770G | Synonymous      | rs17101196 | 0.08            | 0.08             | -    | LB    |
| 4       | NRG3   | c.C1986T | Synonymous      | rs2295933  | 0.38            | 0.38             | -    | LB    |
| 4       | EDNRB* | c.G1392A | Missense        | -          |                 |                  | 25.7 | VUS   |
| 4       | ZEB2   | c.G3480A | Synonymous      | -          | .               | .                | -    | LB    |
| 4       | DENND3 | c.G3090A | Synonymous      | rs1045303  | 0.34            | 0.28             | -    | LB    |
| 5       | NUP98  | c.G2688A | Synonymous      | rs35803045 | 0.05            | 0.05             | 3.8  | LB    |

All variants are heterozygous and detected in both cell types. Variants marked with \* are tested and confirmed with Sanger sequencing. Abbreviations - LB: Likely Benign, VUS: Variant of uncertain significance, CADD: Combined Annotation Dependent Depletion (<http://cadd.gs.washington.edu/>), Population frequency depicted is based on the GnomAD genome sequence value (<http://gnomad.broadinstitute.org/>).

**Supplementary Table S4. Rare CNVs identified.**

| Patient | Chromosome Region            | Event                | Length | Cytoband | Probes | Gene Symbols               | Notes    | Classification |
|---------|------------------------------|----------------------|--------|----------|--------|----------------------------|----------|----------------|
| 1       | chr1:185,109,784-185,132,629 | CN Gain              | 22846  | q25.3    | 41     | TRMT1L, SWT1               | rare CNV | VUS            |
| 1       | chr1:41,346,254-41,380,652   | CN Gain              | 34399  | p34.2    | 62     | .                          | rare CNV | Likely Benign  |
| 1       | chr11:54,820,982-54,849,549  | CN Gain              | 28568  | q11      | 25     | .                          | rare CNV | Likely Benign  |
| 1       | chr5:98,757,280-98,811,517   | CN Loss              | 54238  | q21.1    | 45     | .                          | rare CNV | Likely Benign  |
| 2       | chr14:69,924,025-69,983,696  | CN Gain              | 59672  | q24.1    | 84     | SLC39A9, BC062762, PLEKHD1 | rare CNV | VUS            |
| 2       | chr17:30,106,771-30,107,696  | CN Loss              | 926    | q11.2    | 5      | .                          | rare CNV | Likely Benign  |
| 2       | chr8:43,727,152-43,831,881   | CN Gain              | 104730 | p11.1    | 23     | .                          | rare CNV | Likely Benign  |
| 2       | chrX:5,159,410-5,163,874     | Homozygous Copy Loss | 4465   | p22.32   | 5      | .                          | rare CNV | Likely Benign  |
| 3       | chr2:10,664,398-10,914,786   | CN Gain              | 250389 | p25.1    | 70     | NOL10, RN7SL832P, ATP6V1C2 | rare CNV | VUS            |
| 4       | chr1:37,629,746-37,692,299   | CN Loss              | 62554  | p34.3    | 7      | .                          | rare CNV | Likely Benign  |
| 5       | chr6:22,008,230-22,093,109   | CN Loss              | 84880  | p22.3    | 32     | CASC15, LINC00340          | rare CNV | VUS            |
| 5       | chrX:33,886,710-34,031,196   | Homozygous Copy Loss | 144487 | p21.1    | 15     | .                          | rare CNV | Likely Benign  |

Abbreviations - CN: Copy Number, CNV: Copy Number Variant, VUS: Variant of uncertain significance

**Supplementary Table S5. Patients included in this study, their clinical features and complications.**

| Patient | Age at surgery (days) | Length HSCR        | Additional features | Complications post-surgery                       |
|---------|-----------------------|--------------------|---------------------|--------------------------------------------------|
| 1       | 88                    | 15cm; rectosigmoid | None                | No complications                                 |
| 2       | 132                   | 13cm; rectosigmoid | None                | Hirschsprung Associated Enterocolitis            |
| 3       | 194                   | 15cm; rectosigmoid | None                | Obstructed defecation requiring rectal flushings |
| 4       | 105                   | 15cm; rectosigmoid | None                | Hirschsprung Associated Enterocolitis            |
| 5       | 114                   | 10cm; rectosigmoid | None                | No complications                                 |
